# Supplementary material for: Boosting the crystallinity of novel two-dimensional hexamine dipyrazino quinoxaline-based covalent organic frameworks for electrical double-layer supercapacitors
Source: Royal Society of Chemistry journal article supplement (doi:10.1039/d3qm00169e), 2023-01-01
Supplement: d3qm00169e1.pdf [file d3qm00169e1.pdf]

## Supplementary Information

# **Boosting the Crystallinity of Novel Two-Dimensional Hexamine Dipyrazino Quinoxaline-Based Covalent Organic Framework for Electrical Double-Layer Supercapacitor**

Rashid Iqbal<sup>a,b,c\*</sup>, Muhammad Kashif Majeed<sup>d</sup>, Arshad Hussain<sup>b,c</sup>, Aziz Ahmad<sup>e</sup>, Muhammad Ahmad<sup>b,c</sup>, Bushra Jabbar<sup>c,h</sup>, Abdul Rehman Akbar<sup>b,c</sup>, Sajjad Alif<sup>f</sup>, Sajid Rauf<sup>g</sup>, Adil Saleem<sup>c,h\*</sup>

*<sup>a</sup>Key Laboratory of Colloid and Interface Chemistry of the Ministry of Education, School of Chemistry and Chemical Engineering, Shandong University, 250100 Jinan, China.*

*<sup>b</sup>Institute for Advanced Study, Shenzhen University, Shenzhen 518060, China.*

*<sup>c</sup>College of Physics and Optoelectronic Engineering, Shenzhen University, Shenzhen 518060, China.*

*<sup>d</sup>Materials Chemistry Laboratory, Department of Materials Science & Engineering, The University of Texas at Arlington, Arlington, TX, USA.*

*<sup>e</sup>Interdisciplinary Research Center for Hydrogen and Energy Storage (IRC-HES), King Fahd University of Petroleum & Minerals, KFUPM Box 5040, Dhahran 31261, Saudi Arabia.*

*<sup>f</sup>Yangtze Delta Region Institute (Huzhou), University of Electronic Science and Technology of China, Huzhou, 313001, China.*

*<sup>g</sup>College of Electronics and Information Engineering, Shenzhen University, Guangdong Province 518000, China.*

*<sup>h</sup>College of Mechatronics and Control Engineering, Shenzhen University, Shenzhen, Guangdong 518060, China.*

## Catalogue

|                                                                                                                           |           |
|---------------------------------------------------------------------------------------------------------------------------|-----------|
| <b>Section 1. Materials and Methods .....</b>                                                                             | <b>2</b>  |
| <i>1.2. XRD Pawley Refinement .....</i>                                                                                   | <i>3</i>  |
| <i>1.3. Electrochemical Measurements.....</i>                                                                             | <i>3</i>  |
| <b>Section 2. Elemental composition of pristine HADQ COF, 200-HADQ COF and 250-HADQ COF</b>                               | <b>4</b>  |
| <b>Section 3. XPS spectroscopies of pristine HADQ COF, 200-HADQ COF and 250-HADQ COF ..</b>                               | <b>6</b>  |
| <b>Section 4. FE SEM Images of HADQ COF .....</b>                                                                         | <b>7</b>  |
| <b>Section 5. Surface Parameters of pristine HADQ COF, 200-HADQ COF and 250-HADQ COF</b>                                  | <b>8</b>  |
| <b>Section 6. EIS Profiles of 250-HADQ COF in EMIMBF<sub>4</sub> and 1 M H<sub>2</sub>SO<sub>4</sub>.....</b>             | <b>9</b>  |
| <b>Section 7. Electrochemical performance measured in and EMIMBF<sub>4</sub> and 1 M H<sub>2</sub>SO<sub>4</sub>.....</b> | <b>10</b> |
| <b>Section 8. Energy/power density comparison with the reported double-layer supercapacitors ..</b>                       | <b>12</b> |
| <b>Section 9. Computational studies for molecular structure of HADQ COF.....</b>                                          | <b>15</b> |
| <b>Section 10. Computational setup for theoretical specific surface area of HADQ COF .....</b>                            | <b>16</b> |
| <b>Section 11. References .....</b>                                                                                       | <b>41</b> |

## Section 1. Materials and Methods

The reported approach was used to create 2,3,6,7,10,11-hexaamine dipyrazino quinoxaline. [1] Hexane, ethyl acetate, sodium tertbutoxide, benzophenone imine, tetrahydrofuran, cobalt chloride hexahydrate, acetic acid, concentrated nitric acid, iron powder, and diethyl ether are among the chemicals used in this process. The following substances were bought from Sigma Aldrich: 1, 2-dichlorobenzene, nitro benzene, bromine water, tris(dibenzylideneacetone)dipalladium (0), dichlorometane, silica gel, ethyl acetate, n-hexane, deuterated chloroform, and deuterated dimethyl sulfoxide. A JASCO model FT IR-6100 Fourier transform infrared spectrometer was used to record infrared (IR) spectra. Field ionization On a Hitachi model S-4200, scanning electron microscopy (FESEM) was carried out. FE-SEM running at 5.0 kV of accelerating voltage. On a Tecnai model F-20 microscope, transmission electron microscopy (TEM) images were captured. On a Rigaku RINT

Ultima III diffractometer, data from powder x-ray diffraction (PXRD) were collected. On a Shimadzu DT-30B, thermo gravimetric analysis (TGA) measurements were made with a continuous N<sub>2</sub> purge and a heating rate of 5 °C/min from ambient temperature to 1000 °C. Using an ASAP 2020, the samples' nitrogen sorption/desorption isotherms were measured at 77.15K. (Micromeritics). The materials were outgassed prior to adsorption for six hours at 150 °C and 10<sup>-6</sup> Torr of vacuum. The specific surface area and pore size distribution were calculated, respectively, using the Brunauer-Emmett-Teller (BET) technique and the density functional theory (DFT) pore model. At a base pressure of 110<sup>-9</sup> mbar and using an Al K X-ray source, an ESCALAB250 apparatus was used to conduct the X-ray photoelectron spectroscopy (XPS) measurement.

### ***1.2. XRD Pawley Refinement***

Reflex in MS modeling ver. 6.0 was used to refine the Pawley model (Accelrys Inc.). First, using the hexagonal crystal structure, we manually determined the unit cell's size from the observed experimental XRD peak positions. With the aid of the computed dimensions of the unit cell, the lattice parameters were refined using the Pawley method until the RWP value converged. The findings reveal a hexagonal crystal system with unit cell parameters of  $\alpha=\beta=90^\circ$  and  $\gamma=120^\circ$ , together with  $a=b=15.650 \text{ \AA}$  and  $c=3.49006 \text{ \AA}$ . The pseudo-Voigt and Berrar-Baldinozzi functions were used for profile fitting and asymmetry correction. 2.73 percent and 1.23 percent, respectively, were the final RWP and RP figures.

### ***1.3. Electrochemical Measurements***

With EMIMBF<sub>4</sub> and 1M H<sub>2</sub>SO<sub>4</sub> acting as the appropriate electrolytes, electrochemical tests were carried out in a conventional two-electrode symmetric supercapacitor system (a coin-type cell of 2032 size). The HADQ COF (85 weight percent, around 100 mg), carbon black (10 weight percent, Super P conductive), and polytetrafluoroethylene (5 weight percent, 60 percent in water, and diluted to 6 percent before use) were typically ground in an agate mortar to create the electrode films. The

electrode film was cut into a circle with a 12 mm diameter and a mass of around 0.7–1 mg after being vacuum-dried at 120 °C for 12 hours. Two electrodes with nearly the same mass were pressed in between stainless-steel wire meshes (316L, 400 meshes, the diameter of 15 mm) respectively as the two symmetric working electrodes. A coin-type cell was constructed using Glass fiber film (Whatman) as a separator, which was subsequently bathed in EMIMBF<sub>4</sub> and 1M H<sub>2</sub>SO<sub>4</sub> electrolyte. On a CHI660D electrochemical workstation set up at room temperature, CV curves, galvanostatic charge–discharge curves, and Nyquist plots were gathered. The formula  $C = 2It/(mV)$ , where I (unit: A) is the discharge current, m (unit: g) is the mass of HADQ COF in one electrode, t (unit: s) is the discharge time, and V (unit: V) is the discharge voltage, was used to determine the specific capacitance (C, F/g) from the slop of the discharge curve.  $E = (1000*CV^2)/(8/3600)$  was used to calculate the energy densities (E, Wh/kg).  $P = E/(t/3600)$  was used to compute the power densities (P, W/kg).

## Section 2. Elemental composition of pristine HADQ COF, 200-HADQ COF and 250-HADQ COF

**Table S1.** Elemental composition of HADQ COF from different characterization techniques.

| Technique                     | C            | H           | N            | O           | Total        |
|-------------------------------|--------------|-------------|--------------|-------------|--------------|
| <b>Theoretical (wt.%)</b>     | <b>51.44</b> | <b>0.96</b> | <b>39.99</b> | <b>7.61</b> | <b>100</b>   |
| <b>EA (wt.%)<sup>a</sup></b>  | <b>48.63</b> | <b>3.64</b> | <b>39.45</b> | <b>8.26</b> | <b>99.98</b> |
| <b>XPS (at.%)<sup>b</sup></b> | <b>61.4</b>  | <b>N. A</b> | <b>32.4</b>  | <b>6.2</b>  | <b>100</b>   |

200-HADQ COF

| <b>Technique</b>              | <b>C</b>    | <b>H</b>    | <b>N</b>    | <b>O</b>   | <b>Total</b> |
|-------------------------------|-------------|-------------|-------------|------------|--------------|
| <b>Theoretical (wt.%)</b>     | 60.00       | 1.12        | 38.88       | 0          | 100          |
| <b>EA (wt.%)<sup>a</sup></b>  | 58.01       | 1.91        | 37.32       | 2.72       | 99.96        |
| <b>XPS (at.%)<sup>b</sup></b> | <b>68.3</b> | <b>N. A</b> | <b>29.6</b> | <b>2.1</b> | <b>100</b>   |

***250-HADQ COF***

| <b>Technique</b>             | <b>C</b> | <b>H</b> | <b>N</b> | <b>O</b> | <b>Total</b> |
|------------------------------|----------|----------|----------|----------|--------------|
| <b>EA (wt.%)<sup>a</sup></b> | 61.21    | 1.08     | 36.45    | 1.24     | 99.98        |

<sup>a</sup> EA is most reliable element counts for bulk sample. The higher oxygen and hydrogen contents than theoretical calculation should be due to trapped small molecules (moisture, oxygen, and etc.) in the holes and interlayers of the HADQ COF.

<sup>b</sup> XPS is more sensitive to surface chemical composition.

### Section 3. XPS spectroscopies of pristine HADQ COF, 200-HADQ COF and 250-HADQ COF

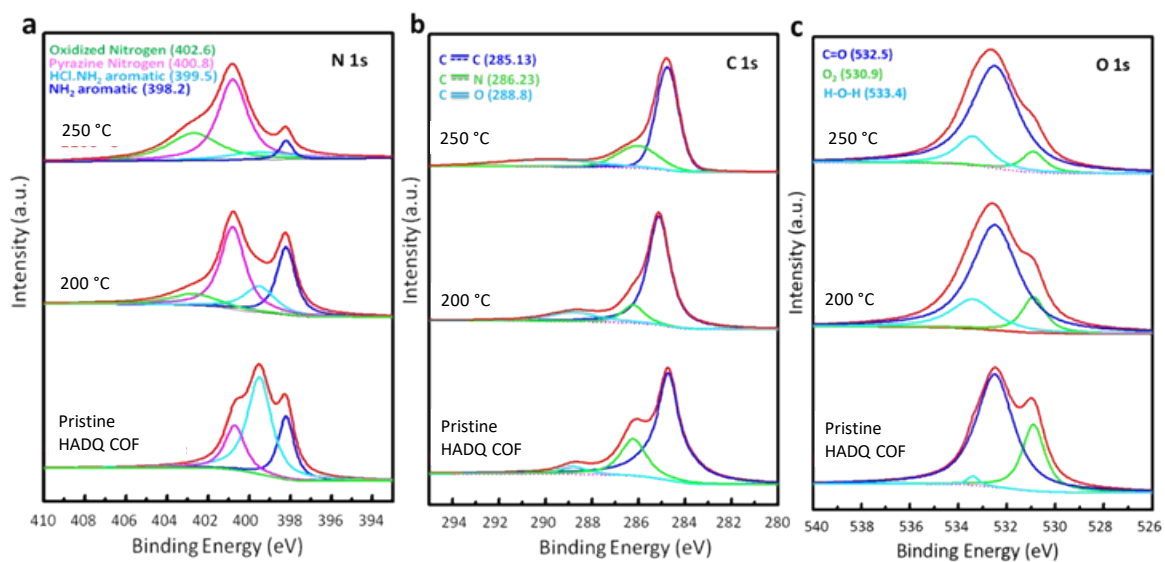

**Figure S1.** XPS Spectra of pristine HADQ COF, 200-HADQ COF and 250-HADQ COF: (a) C 1s. (b) N 1s. (c) O

1s.

## Section 4. FE SEM Images of HADQ COF

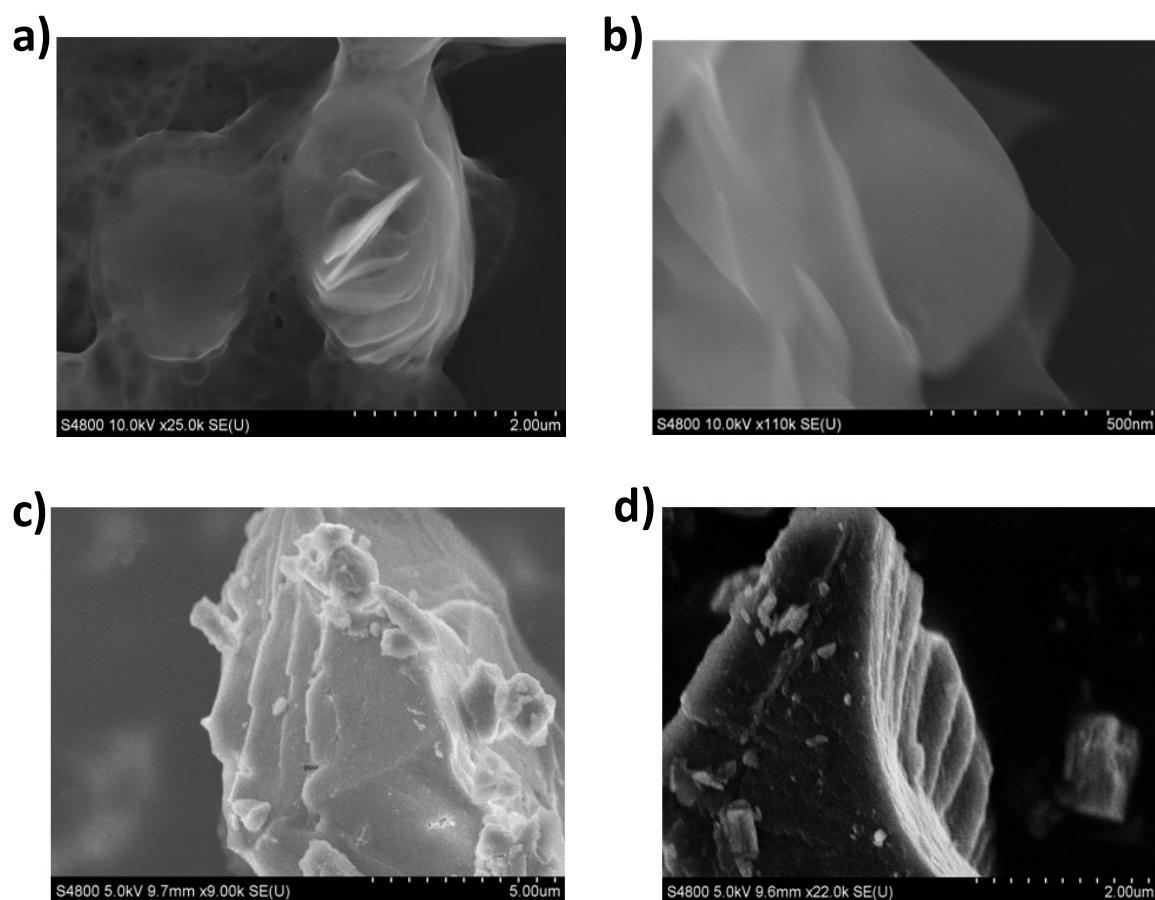

**Figure S2.** (a-b) SEM images of 250-HADQ COF and pristine HADQ COF.

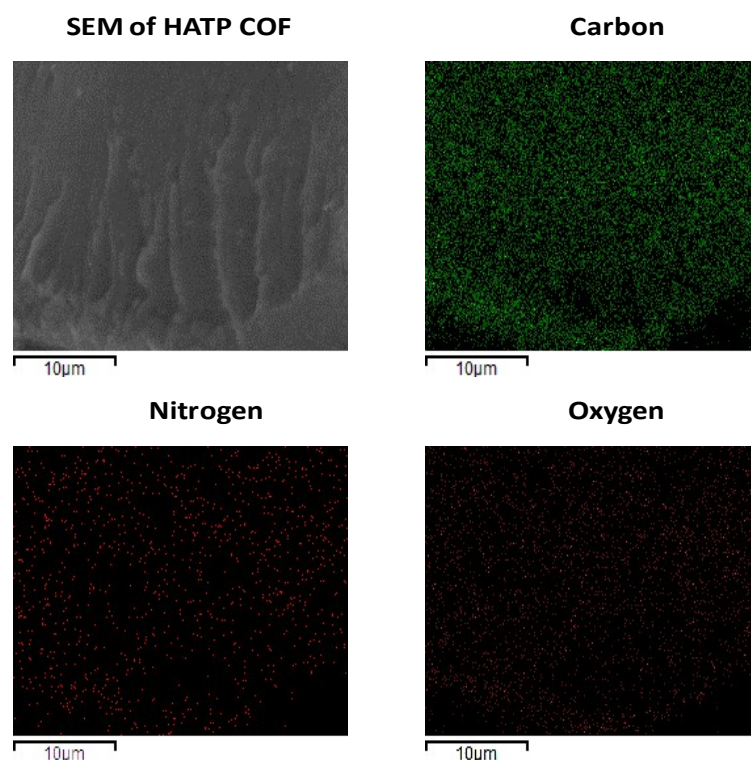

**Figure S3.** SEM mapping of 250-HADQ COF, Carbon mapping, Nitrogen mapping, Oxygen mapping.

### Section 5. Surface Parameters of pristine HADQ COF, 200-HADQ COF and 250-HADQ COF

**Table S2.** Surface parameters of pristine HADQ COF, 200-HADQ COF and 250-HADQ COF.

|                                           | Pristine HADQ<br>COF |        |        |
|-------------------------------------------|----------------------|--------|--------|
|                                           |                      | 200 °C | 250 °C |
| <b>BET Surface Area (m<sup>2</sup>/g)</b> | 746                  | 1453   | 2977   |
| <b>Pore Volume (cm<sup>3</sup>/g)</b>     | 0.98                 | 1.09   | 1.25   |



## Section 6. EIS Profiles of 250-HADQ COF in EMIMBF<sub>4</sub> and 1 M H<sub>2</sub>SO<sub>4</sub>

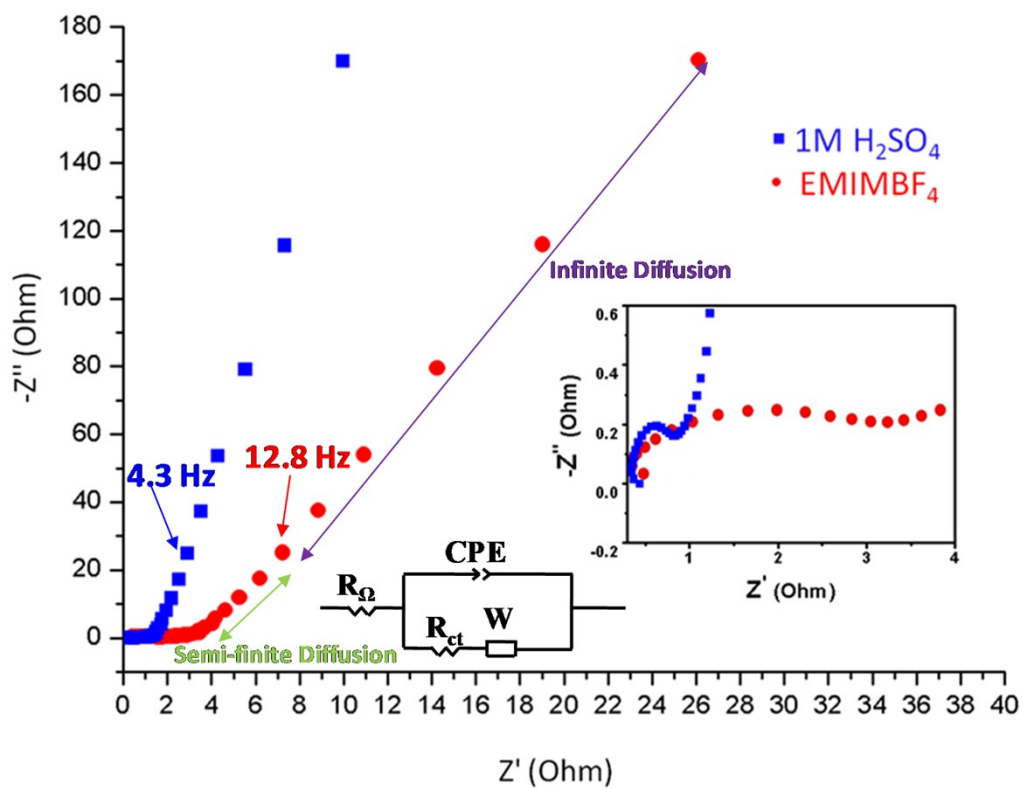

**Figure S4.** EIS Profiles of 250-HADQ COF in EMIMBF<sub>4</sub> and 1 M H<sub>2</sub>SO<sub>4</sub>.

## Section 7. Electrochemical performance measured in and EMIMBF<sub>4</sub> and 1 M H<sub>2</sub>SO<sub>4</sub>

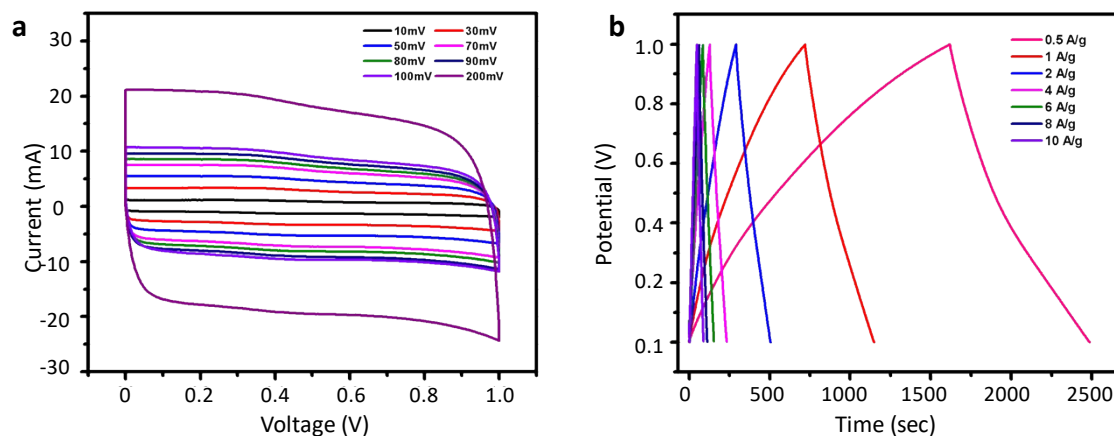

**Figure S5.** Electrochemical performance measured in 1 M H<sub>2</sub>SO<sub>4</sub>: (a) CV curves of 250-HADQ COF at different scan rates. (b) GCD curves of 250-HADQ COF at current densities between 0.5 A/g and 10 A/g.

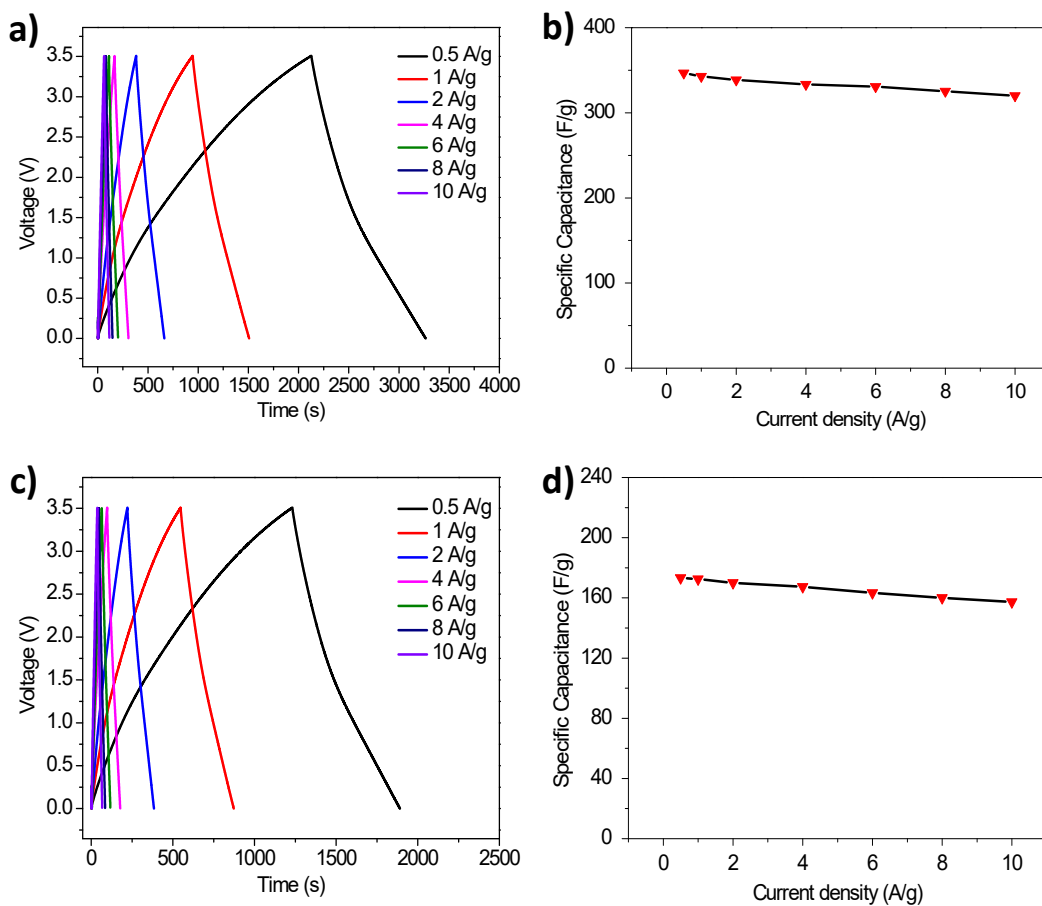

**Figure S6.** Electrochemical performance of 200-HADQ COF and pristine HADQ COF measured in ionic liquid (EMIMBF<sub>4</sub>), respectively: (a, c) GCD curves at current densities between 0.5 A/g to 10 A/g. (b, d) Specific Capacitance at varying current densities.

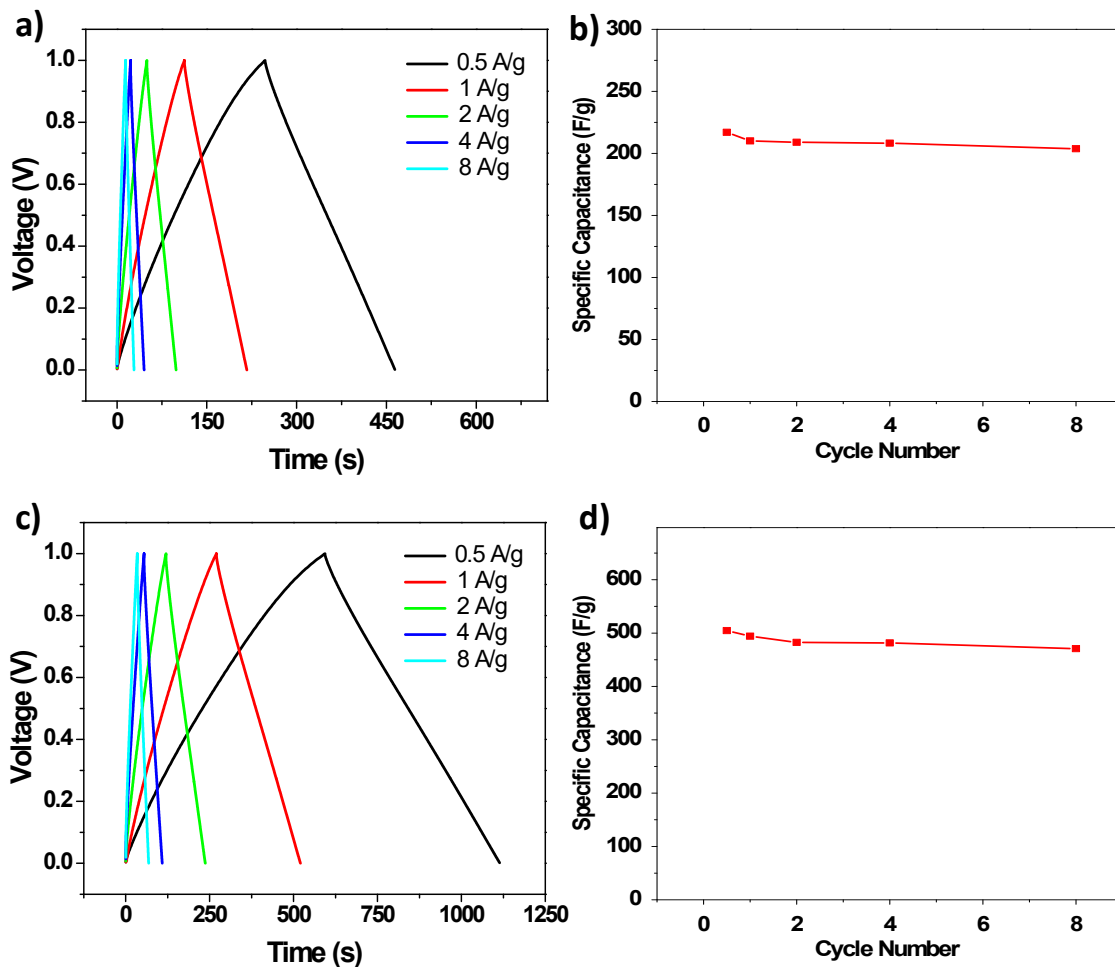

**Figure S7.** Electrochemical performance of pristine HADQ COF and 250-HADQ COF measured using three-electrode system in 1M H<sub>2</sub>SO<sub>4</sub> respectively: (a, c) GCD curves at current densities between 0.5 A/g and 8 A/g. (b, d) Specific Capacitance at varying current densities.

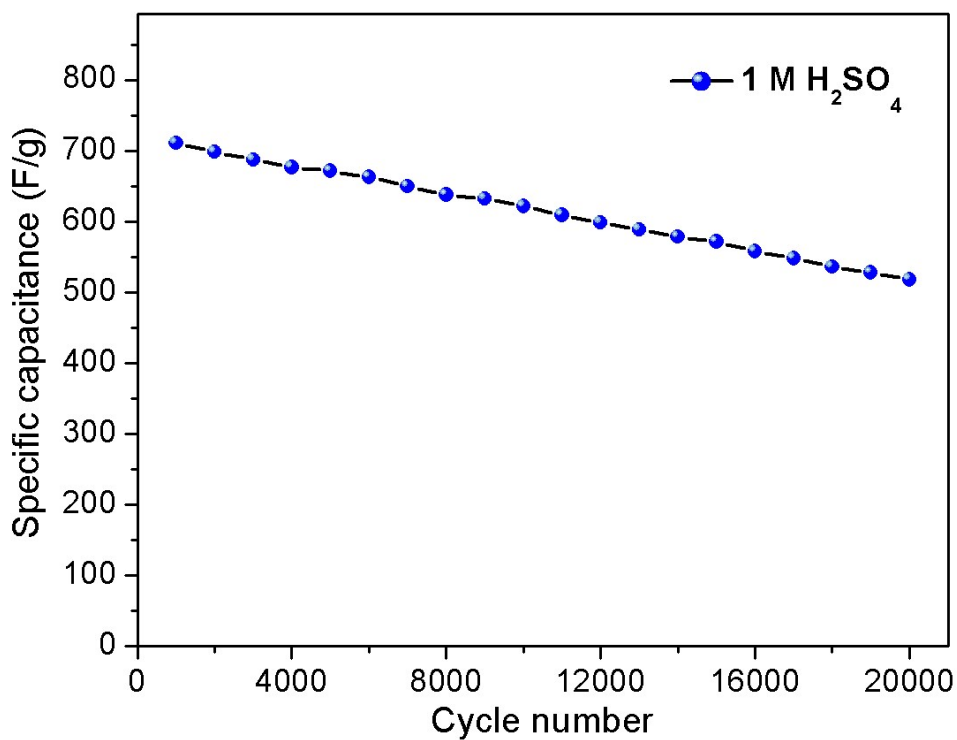

**Figure S8.** Cyclic performance of 250-HADQ COF in 1M H<sub>2</sub>SO<sub>4</sub>.

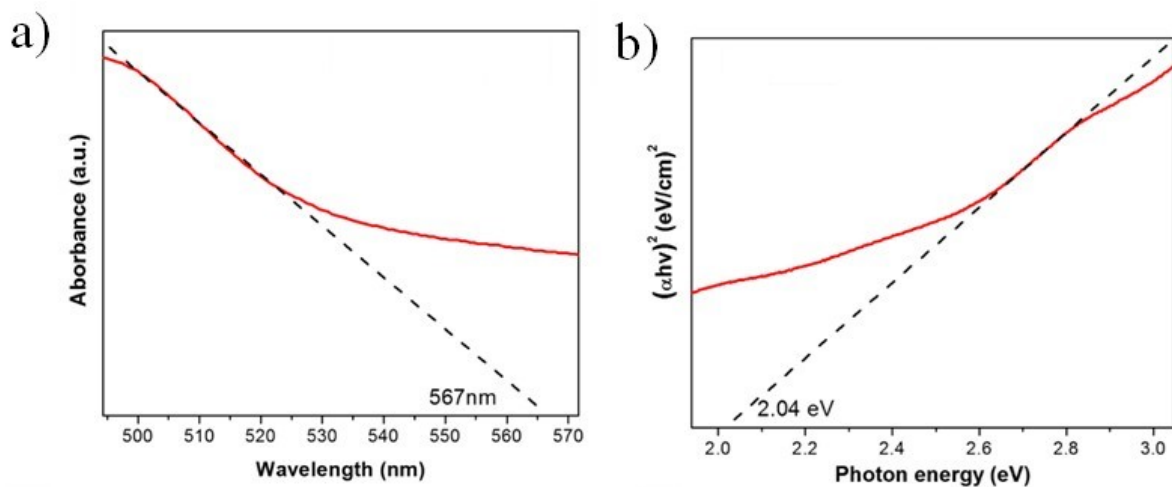

**Figure S9.** UV-VIS-NIR Spectrophotometer spectra of 250-HADQ COF, (b) Corresponding tauc plots of 250-HADQ COF.

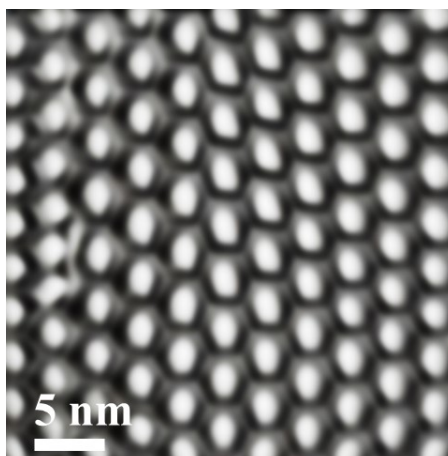

**Figure S10.** HRTEM image of Hexagonal pores of 250-HADQ COF.

## Section 8. Energy/power density comparison with the reported double-layer supercapacitors

**Table S2.** Energy and power density comparison with reported double-layer supercapacitors

| Electrode materials | Electrolyte                                        | Operation voltage (V) | $E_{max}$ (Wh/kg)                 | $P_{max}$ (kW/kg)                   | Stability (cycles) | Ref. |
|---------------------|----------------------------------------------------|-----------------------|-----------------------------------|-------------------------------------|--------------------|------|
| NiFe/rGO            | 1M KOH                                             | 1                     | -                                 | -                                   | 89% (2000)         | [1]  |
| NGFs                | PVA/H <sub>3</sub> PO <sub>4</sub> gel electrolyte | 2.4                   | 19.5 $\mu$ W h/cm <sup>2</sup> at | 40 mW/cm <sup>2</sup> power density | 95.8% (10,000)     | [2]  |
| GWAC                | EMIMBF <sub>4</sub>                                | 3.5                   | 80                                | 70                                  | 98.8% (10000)      | [1]  |
| MEGO electrode      | (BMIM BF <sub>4</sub> )/AN                         | 3.5                   | 68                                | 250                                 | 97% (10000)        | [3]  |

|                                        |                            |     |      |        |             |      |
|----------------------------------------|----------------------------|-----|------|--------|-------------|------|
| HGP-based supercapacitors              | (BMIM BF <sub>4</sub> )/AN | 3.5 | 77   | 338    | 90% (20000) | [4]  |
| (CNFs@polypyrrole)                     | 6M KOH                     | 1.0 | 41.6 | 137    | 97% (3000)  | [5]  |
| Porous 3D graphene based bulk material | EMIMBF <sub>4</sub>        | 3.5 | 98   | 100    | 94% (5000)  | [6]  |
| aG-O14 film electrode                  | TEABF <sub>4</sub> /AN     | 2.8 | 26   | 100    | 95% (2000)  | [7]  |
| 3DG1000-SC                             | EMIMBF <sub>4</sub>        | 4   | 44   | 153    | 99%(20000)  | [8]  |
| 3DG1000-SC                             | 6 M KOH                    | 1   | 8    | 10     | 91%(20000)  | [8]  |
| HGF-EC electrode                       | (EMIMBF <sub>4</sub> /AN)  | 3.5 | 74   | 2.5    | 94% (10000) | [9]  |
| Triazine-Based Framework               | EMIMBF <sub>4</sub>        | 3.5 | 62.7 | 2      | 85% (10000) | [10] |
| flash-reduced graphene-oxide (FRGO)    | EMIMBF <sub>4</sub>        | 3.8 | 76   | 11     | 90% (1000)  | [11] |
| LHC-3K                                 | 6M KOH                     | 1   | 22.9 | 25,400 | 95% (5000)  | [12] |
| PTPB-Z-900                             | EMIMBF <sub>4</sub>        | 3.5 | 36   | 40,000 | 92%         | [13] |

|                          |                                |     |       |      |           |                  |
|--------------------------|--------------------------------|-----|-------|------|-----------|------------------|
|                          |                                |     |       |      | (10000)   |                  |
| PBS-RGO-N                | 6M KOH                         | 1   | 25    | 125  | 86%       | [14]             |
|                          |                                |     |       |      | (10000)   |                  |
| AC//IL//MnO <sub>2</sub> | EMIMBF <sub>4</sub>            | 3   | 210   | 230  | 68%       | [15]             |
|                          |                                |     |       |      | (5000)    |                  |
| 250-HADQ COF             | EMIMBF <sub>4</sub>            | 3.5 | 219.4 | 87.5 | 89%       | This<br>Wor<br>k |
|                          |                                |     |       |      | (100,000) |                  |
| 250-HADQ COF             | H <sub>2</sub> SO <sub>4</sub> | 1   | 30.1  | 25   | 91%       |                  |
|                          |                                |     |       |      | (10000)   |                  |

## Section 9. Computational studies for molecular structure of HADQ COF

The DFTB approach with the LJ dispersion was used to investigate the molecular structure and electronic characteristics of monolayer and stacked HADQ COF isomers. The HOMO–LUMO energy gaps, as well as the associated LJ and crystal-stacking energies, were calculated.  $a=b=15.65$  was the optimal lattice constant. Three distinct stacking configurations were adjusted using the optimized monomer: ideal AA, AA slip-stacked by 0.8 in the a and b directions, and AB. The lattice's third dimension, c, was set to 6.25, 6.25, and 5.25 for the AA, slipped AA, and AB structures, respectively. The slipping AA geometry is the HADQ COF's minimal energy structure. For each structure, HOMO–LUMO gaps have been determined and are displayed in Supplementary Table S1. The HOMO–LUMO gap of the HADQ COF monolayer is 0.65 eV, which is unaffected by any stacking configuration, while the HOMO–LUMO gaps of the slid AA, AA, and AB structures are 0.65, 0.68, and 0.62 eV, respectively.

$$a = b = 15.650861 \text{ \AA}$$

$$c = 3.49006 \text{ \AA}$$

$$\alpha = \beta = 90^\circ$$

$$\gamma = 120^\circ$$

Interlayer distance (D): 3.36 \AA

Pawley refinement Rwp = 2.73%

**Table S3.** The total DFTB energies, LJ, and the total crystal stacking energies per monolayer as well as the corresponding HOMO LUMO energy gap for HADQ COF.

| Stacking                | $c$<br>[\AA] | Total DFTB<br>Energy<br>[a.u.] | LJ<br>energy<br>[a.u.] | Total crystal<br>stacking energy<br>[kcal mol <sup>-1</sup> ] | HOMO-LUMO<br>gap<br>[eV] |
|-------------------------|--------------|--------------------------------|------------------------|---------------------------------------------------------------|--------------------------|
| Monolayer               |              | -243.0177                      | 1.162                  |                                                               | 0.6525                   |
| AA                      | 6.07         | -486.147851                    | 2.2503                 | 29.01                                                         | 0.6575                   |
| Slipped AA (0.8<br>\AA) | 4.01         | -486.406628                    | 1.9768                 | 110.20                                                        | 0.6885                   |
| AB                      | 4.49         | -486.291736                    | 2.1057                 | 74.15                                                         | 0.6213                   |

## Section 10. Computational setup for theoretical specific surface area of HADQ COF

The present study has been performed by using DFT with generalized gradient approximation (GGA) and the Perdew-Burke-Ernzerhof (PBE)[16] functional for the exchange-correlation potentials that have been accomplished through Vienna ab initio simulation package (VASP)[17-19]. In order to optimize the structure, a  $5 \times 5 \times 1$  k-points and 450 eV energy cutoff have been applied.



The COF was modeled via a periodic unit cell containing 30 atoms (18 carbon and 12 nitrogen atoms). The COF unit cell is hexagonal with unit-cell parameters  $a = b = 13.86$ ,  $c = 3.94 \text{ \AA}$  and  $\alpha = \beta = 90^\circ$ ;  $\gamma = 60^\circ$  in reciprocal space and the periodic condition is employed along the a and b directions. The total energy was converged to an accuracy of  $1 \times 10^{-5} \text{ eV}$  to obtain accurate forces, and a force tolerance of  $-0.02 \text{ eV/\AA}$  was applied in the structure optimization.

The theoretical surface area of COF materials is calculated as;

One proton mass is  $m_p = 1.6726231 \times 10^{-27} \text{ kg}$ ;

one C atom mass:  $12 \times m_p = 12 \times 1.6726231 \times 10^{-27} = 2.00714772 \times 10^{-26} \text{ kg}$ ;

one N atom mass:  $14 \times m_p = 14 \times 1.6726231 \times 10^{-27} = 2.34167234 \times 10^{-26} \text{ kg}$

Total mass:

$$M = 18 \text{ C} + 12 \text{ N} = 18 \times 2.00714772 \times 10^{-26} + 12 \times 2.34167234 \times 10^{-26} = 64.22872704 \times 10^{-24} \text{ kg}$$

per area;

$$A = a \times b \times \sin 60 (\text{\AA}^2) = 13.86 \times 13.86 \times \sin 60^\circ = 166.3631337 (\text{\AA}^2)$$

$$A/M = \frac{166.3631337 \text{ \AA}^2}{64.22872704 \times 10^{-26} \text{ Kg}} = 2.59016707 \times 10^{26} \text{ \AA}^2 / \text{kg}$$

$$A/M = 2590.1670689071 (\text{m}^2/\text{g})$$

Therefore, the theoretical surface is of COF materials is  $2590.1670689071 (\text{m}^2/\text{g})$  which is consistent with experimental measured BET surface area of COF ( $2743 \text{ m}^2/\text{g}$ ).

**Table S4.** Fractional atomic coordinates of AA stacked structure for 250-HADQ COF.

| Atom | x           | y           | z          | population |
|------|-------------|-------------|------------|------------|
| H    | -2.26072953 | 4.60735469  | 4.17854197 | 0.9122687  |
| H    | 4.46614391  | 4.54094576  | 4.17974516 | 0.91319645 |
| H    | 4.42140739  | 0.18259102  | 4.09171623 | 0.9134171  |
| H    | -2.31222895 | 0.24661488  | 4.14964901 | 0.90963096 |
| H    | -1.49092432 | -3.57807145 | 4.19959604 | 0.90799854 |
| H    | 3.51558444  | -3.63445859 | 4.27276397 | 0.91299108 |
| H    | -1.40220622 | 8.37561207  | 4.34461959 | 0.90747193 |
| H    | 3.60340717  | 8.39288914  | 4.37520873 | 0.90726421 |
| H    | -2.45219629 | -5.21779861 | 4.43230721 | 0.90798127 |
| H    | 0.03677724  | -9.54330152 | 4.02761189 | 0.90692375 |
| H    | 4.42183807  | -5.28756186 | 4.65370267 | 0.91138829 |
| H    | 1.87005292  | -9.57030663 | 4.1865389  | 0.90596618 |
| H    | -2.3422249  | 9.99423884  | 4.28676009 | 0.90670395 |
| H    | 0.11690421  | 14.30403276 | 4.94149312 | 0.91146701 |
| H    | 4.52992152  | 10.04136906 | 4.25753754 | 0.90792347 |
| H    | 2.0133882   | 14.32968688 | 4.82125479 | 0.91323713 |
| H    | 8.25830917  | 11.23465776 | 4.07764722 | 0.90904984 |
| H    | 12.00492877 | 13.45945976 | 3.89984499 | 0.91114568 |
| H    | -6.17372919 | -6.41600626 | 4.44039499 | 0.91250839 |
| H    | -9.93474838 | -8.60140616 | 4.50894276 | 0.91158402 |
| H    | -6.1214765  | 11.15902838 | 4.11700589 | 0.90977986 |
| H    | -9.87856982 | 13.36302336 | 4.09756457 | 0.90853632 |
| H    | 8.08627355  | -6.51448048 | 4.5944103  | 0.90911573 |
| H    | 11.85875236 | -8.69635486 | 4.68964753 | 0.91346704 |
| H    | 6.55592268  | 0.37201326  | 4.92854617 | 0.93351878 |
| H    | 6.50309296  | 0.41257481  | 3.14912801 | 0.93371103 |
| H    | 7.9167471   | 1.02282427  | 4.01420375 | 0.93761137 |
| H    | 6.34202746  | 4.20371916  | 2.83346363 | 0.93260486 |

|   |           |            |            |            |
|---|-----------|------------|------------|------------|
| H | 7.7649435 | 3.15837219 | 2.7428746  | 0.9376714  |
| H | 6.2672325 | 2.68925885 | 1.91397561 | 0.93327209 |

|   |              |             |            |            |
|---|--------------|-------------|------------|------------|
| H | 7.83920765   | 3.11961841  | 5.37272909 | 0.93742556 |
| H | 6.40701634   | 4.15595414  | 5.40797025 | 0.93319912 |
| H | 6.39886378   | 2.60951495  | 6.27278915 | 0.93332067 |
| H | -4.45181058  | 0.53112686  | 3.27154955 | 0.93307815 |
| H | -4.38857618  | 0.51104526  | 5.05157529 | 0.93020021 |
| H | -5.79397314  | 1.18402468  | 4.21772983 | 0.93992536 |
| H | -4.16064073  | 4.30761189  | 5.44824084 | 0.9340754  |
| H | -5.59315696  | 3.27365651  | 5.5385753  | 0.93975189 |
| H | -4.09108064  | 2.78505582  | 6.35046649 | 0.92779602 |
| H | -5.62805066  | 3.28939783  | 2.86137841 | 0.93920668 |
| H | -4.17500845  | 4.29752966  | 2.88317187 | 0.93254219 |
| H | -4.17009667  | 2.76417722  | 1.99276352 | 0.93052493 |
| H | -9.39611778  | 11.7382855  | 1.79029868 | 0.93306369 |
| H | -7.86449175  | 10.82804143 | 1.75474033 | 0.93140689 |
| H | -9.41941871  | 9.95672786  | 1.7588134  | 0.93144979 |
| H | -7.89015967  | 9.47904494  | 5.15711802 | 0.92361163 |
| H | -8.76467448  | 8.6227865   | 3.88271482 | 0.9393723  |
| H | -7.20165067  | 9.35608016  | 3.53405385 | 0.93542722 |
| H | -10.78681085 | 9.7869975   | 3.91919589 | 0.93936701 |
| H | -10.43093    | 10.917771   | 5.22521259 | 0.92227279 |
| H | -10.94886747 | 11.52178643 | 3.6471814  | 0.93423656 |
| H | 9.66326463   | 9.54335804  | 4.87977719 | 0.929429   |
| H | 9.44214986   | 9.54825051  | 3.1129732  | 0.93289623 |
| H | 10.80629759  | 8.69177222  | 3.83503731 | 0.94117346 |
| H | 12.43021085  | 11.72510231 | 2.29544738 | 0.93224787 |
| H | 12.35203536  | 9.95555876  | 2.27835517 | 0.94046568 |
| H | 11.00971776  | 10.91152797 | 1.62398032 | 0.92601237 |
| H | 12.6334709   | 9.8358804   | 4.97143331 | 0.940771   |
| H | 12.94762272  | 11.56018782 | 4.74854276 | 0.93549786 |
| H | 11.71693202  | 11.04215185 | 5.9250925  | 0.92101065 |
| H | 12.44090708  | -6.95362384 | 3.22068113 | 0.93354438 |
| H | 11.07060218  | -6.22988969 | 2.35832589 | 0.93244897 |

|   |             |             |            |            |
|---|-------------|-------------|------------|------------|
| H | 12.29600906 | -5.19289891 | 3.11597148 | 0.93655943 |
|---|-------------|-------------|------------|------------|

|   |              |              |             |            |
|---|--------------|--------------|-------------|------------|
| H | 9.35265453   | -4.76836518  | 5.41298783  | 0.93354742 |
| H | 10.56776402  | -3.93568391  | 4.43864848  | 0.93728726 |
| H | 9.29846422   | -4.86175763  | 3.63487921  | 0.93319728 |
| H | 12.38086539  | -5.0288736   | 5.75027429  | 0.93688409 |
| H | 11.24477687  | -6.00062372  | 6.70786991  | 0.93268497 |
| H | 12.56032772  | -6.78789199  | 5.81616143  | 0.93386333 |
| H | -8.75414492  | -5.64104561  | 6.59338865  | 0.93305391 |
| H | -7.41657368  | -4.91120051  | 5.68447747  | 0.93345483 |
| H | -9.01231795  | -4.14967282  | 5.66578167  | 0.93751985 |
| H | -8.7215941   | -5.83949254  | 2.2390938   | 0.93256623 |
| H | -9.02249711  | -4.27297239  | 3.01911706  | 0.93767575 |
| H | -7.4135683   | -5.0014175   | 3.09641573  | 0.93306417 |
| H | -10.91673506 | -5.11510482  | 4.36648624  | 0.93735076 |
| H | -10.80359088 | -6.67728061  | 3.55536764  | 0.93384304 |
| H | -10.82156953 | -6.58603864  | 5.33149503  | 0.93362146 |
| H | -3.67351227  | 1.14530453   | -0.10285151 | 0.91340778 |
| H | 3.0598639    | 1.08635544   | -0.16905363 | 0.90958074 |
| H | 3.01314011   | -3.27453847  | -0.15044679 | 0.91219713 |
| H | -3.71412521  | -3.2135702   | -0.16354055 | 0.91320312 |
| H | -2.84834524  | -7.05952835  | -0.27138055 | 0.90705854 |
| H | 2.15743555   | -7.04342903  | -0.2193385  | 0.90740725 |
| H | -2.76617967  | 4.96728863   | -0.23114709 | 0.91300843 |
| H | 2.24091764   | 4.89640071   | -0.17131621 | 0.9076866  |
| H | -3.77075793  | -8.69484719  | -0.08319663 | 0.9072009  |
| H | -1.27494056  | -12.99314251 | -0.6619685  | 0.91282813 |
| H | 3.09899504   | -8.65915306  | -0.18907857 | 0.90668898 |
| H | 0.63443642   | -12.96995157 | -0.81605513 | 0.91141037 |
| H | -3.66122386  | 6.62783245   | -0.63091266 | 0.9114237  |
| H | -1.10278116  | 10.89724355  | -0.08305699 | 0.90634853 |
| H | 3.20221787   | 6.52325031   | -0.37917948 | 0.90769446 |
| H | 0.74151346   | 10.8531986   | 0.14202357  | 0.90710215 |
| H | 6.98848628   | 7.73405022   | -0.4141573  | 0.91293124 |

|   |             |            |             |            |
|---|-------------|------------|-------------|------------|
| H | 10.71246678 | 9.98377959 | -0.55494922 | 0.91165206 |
|---|-------------|------------|-------------|------------|

|   |              |              |             |            |
|---|--------------|--------------|-------------|------------|
| H | -7.59772261  | -9.89471748  | 0.06343654  | 0.91205594 |
| H | -11.27604762 | -12.2315506  | 0.19915973  | 0.9076601  |
| H | -7.33042641  | 7.85733825   | -0.60281357 | 0.91180691 |
| H | -11.09571643 | 10.05235886  | -0.68214402 | 0.91090072 |
| H | 6.89029403   | -9.8124778   | -0.12133101 | 0.90985316 |
| H | 10.64519466  | -12.01974607 | -0.09582989 | 0.90853734 |
| H | 4.91355634   | -1.42530686  | 2.01382926  | 0.93050393 |
| H | 4.92845395   | -2.96016297  | 1.12623544  | 0.93248386 |
| H | 6.37710028   | -1.94603332  | 1.15200518  | 0.93921201 |
| H | 4.84923537   | -1.45465674  | -2.3439213  | 0.92790604 |
| H | 6.34816615   | -1.94272872  | -1.52593776 | 0.93968066 |
| H | 4.91441369   | -2.97537696  | -1.43811169 | 0.93407872 |
| H | 6.54340628   | 0.15301521   | -0.20843761 | 0.93990808 |
| H | 5.14073138   | 0.82146938   | -1.05045565 | 0.93082499 |
| H | 5.19601012   | 0.80674293   | 0.72986497  | 0.9330378  |
| H | -5.65527609  | -1.28324323  | -2.26948047 | 0.93334166 |
| H | -5.65826962  | -2.82958632  | -1.40424047 | 0.93322286 |
| H | -7.09214569  | -1.79553487  | -1.36513065 | 0.9374402  |
| H | -5.51102282  | -1.36131714  | 2.08895985  | 0.93324789 |
| H | -7.01238695  | -1.828524    | 1.26556619  | 0.93769695 |
| H | -5.5916007   | -2.87616564  | 1.17064566  | 0.93265567 |
| H | -7.16727793  | 0.30401799   | -0.00706907 | 0.93761876 |
| H | -5.75041977  | 0.91560274   | 0.85187614  | 0.93369997 |
| H | -5.80997557  | 0.95381008   | -0.92737987 | 0.93354989 |
| H | -9.95043786  | 6.97862636   | -2.66906556 | 0.932916   |
| H | -8.59039119  | 6.30553277   | -1.75104448 | 0.93366096 |
| H | -10.18046256 | 5.53626705   | -1.66031791 | 0.93688253 |
| H | -9.8378734   | 7.39595131   | 1.66902287  | 0.93230545 |
| H | -10.15703443 | 5.79355717   | 0.97318859  | 0.93684849 |
| H | -8.54849929  | 6.51475332   | 0.82951789  | 0.93325115 |
| H | -12.08047275 | 6.5865843    | -0.41590924 | 0.93704449 |
| H | -11.9390064  | 8.17235166   | 0.34792205  | 0.93328763 |



|   |              |            |             |            |
|---|--------------|------------|-------------|------------|
| H | -11.97079924 | 8.03038838 | -1.42802945 | 0.93361377 |
|---|--------------|------------|-------------|------------|

|   |              |              |             |            |
|---|--------------|--------------|-------------|------------|
| H | 9.81340886   | 7.1789579    | 1.64543739  | 0.93285157 |
| H | 8.4174344    | 6.34412969   | 0.93665406  | 0.93342898 |
| H | 10.03006417  | 5.62709761   | 0.80954253  | 0.9373896  |
| H | 9.32859259   | 7.02503008   | -2.68534717 | 0.93241375 |
| H | 9.75991094   | 5.54017808   | -1.81565751 | 0.93747998 |
| H | 8.14416744   | 6.23107897   | -1.63120571 | 0.93362507 |
| H | 11.76188423  | 6.55976959   | -0.76162069 | 0.93750278 |
| H | 11.49488531  | 8.06318243   | -1.64842163 | 0.93273584 |
| H | 11.69467905  | 8.0869086    | 0.12162859  | 0.93386644 |
| H | 8.65181697   | -8.14089801  | -1.15975077 | 0.92366207 |
| H | 7.97724289   | -8.00126971  | 0.4675123   | 0.93532362 |
| H | 9.54187853   | -7.27894735  | 0.09943975  | 0.93937646 |
| H | 10.15668826  | -10.39792671 | 2.20843826  | 0.93329538 |
| H | 10.15766379  | -8.61666145  | 2.2495184   | 0.93108672 |
| H | 8.61411807   | -9.50658354  | 2.23509757  | 0.93135121 |
| H | 11.56359279  | -8.45261606  | 0.13866026  | 0.93980394 |
| H | 11.70957361  | -10.19905725 | 0.33241499  | 0.93405922 |
| H | 11.20678645  | -9.51819826  | -1.21985494 | 0.92229065 |
| H | -10.36871523 | -9.87702061  | 2.53158622  | 0.92315117 |
| H | -9.04114806  | -8.85002006  | 1.92042192  | 0.9304191  |
| H | -10.68905519 | -8.20206543  | 2.02838883  | 0.94092922 |
| H | -10.3392755  | -8.76537342  | -1.63331323 | 0.92663797 |
| H | -10.50654833 | -7.5395471   | -0.36732058 | 0.94165397 |
| H | -8.93222213  | -8.28988559  | -0.65395254 | 0.93137687 |
| H | -12.4646021  | -8.90869171  | 0.33235328  | 0.93948591 |
| H | -12.17291133 | -10.279868   | -0.74517428 | 0.93261935 |
| H | -12.29401596 | -10.52317257 | 1.01679555  | 0.93277793 |
| C | 4.66124324   | 2.35997072   | 4.12860284  | 3.993732   |
| C | 3.94276623   | 3.57118554   | 4.16605327  | 4.09356803 |
| C | 2.53708781   | 3.60406859   | 4.17802109  | 4.00771259 |
| C | 1.80219864   | 2.3858348    | 4.16158755  | 4.00313815 |
| C | 2.51507381   | 1.15728191   | 4.1439241   | 4.00723276 |

|   |            |           |            |            |
|---|------------|-----------|------------|------------|
| C | 3.92342429 | 1.1632579 | 4.12015252 | 4.09648899 |
|---|------------|-----------|------------|------------|

|   |             |             |            |            |
|---|-------------|-------------|------------|------------|
| C | 1.82243091  | 4.88224614  | 4.20739931 | 3.85641772 |
| C | 0.35371297  | 2.39644368  | 4.16079501 | 4.00745872 |
| C | -0.35748082 | 3.62522919  | 4.16876777 | 4.00843271 |
| C | -1.76195934 | 3.62495789  | 4.16682005 | 4.08874555 |
| C | -2.50512017 | 2.4300249   | 4.15931464 | 3.98436893 |
| C | -1.79433725 | 1.21750574  | 4.15140807 | 4.09120735 |
| C | -0.38591893 | 1.18404331  | 4.15238108 | 4.01104418 |
| C | 1.77553776  | -0.10656938 | 4.15848894 | 3.85387109 |
| C | 0.32849773  | -0.09237253 | 4.1609742  | 3.85630754 |
| C | 0.30940503  | -2.39648916 | 4.21034343 | 3.85354049 |
| C | 1.74404435  | -2.41125407 | 4.22029609 | 3.85118806 |
| C | -0.3931473  | -3.62985322 | 4.23140471 | 4.13564077 |
| C | 2.41606505  | -3.66047548 | 4.27326296 | 4.13529394 |
| C | 1.71904527  | -4.87235089 | 4.31829137 | 3.978439   |
| C | 0.37697544  | 4.88815495  | 4.19639282 | 3.85485659 |
| C | 0.38705559  | 7.1879305   | 4.27075145 | 3.85277874 |
| C | 1.82130674  | 7.18704016  | 4.28266095 | 3.85272702 |
| C | -0.30430985 | 8.42366997  | 4.33262166 | 4.13511504 |
| C | 2.50501385  | 8.42969165  | 4.34938554 | 4.1342327  |
| C | 1.81892264  | 9.64767665  | 4.40689693 | 3.98228361 |
| C | 0.27427232  | -4.85729537 | 4.28309589 | 3.97937565 |
| C | -0.47402521 | -6.12495972 | 4.27540256 | 3.98121945 |
| C | -1.87137848 | -6.14581246 | 4.33242237 | 4.13344989 |
| C | 0.24109006  | -7.37593983 | 4.19660478 | 3.98182624 |
| C | 2.43840081  | -6.15551364 | 4.3780224  | 3.98029694 |
| C | -2.60040123 | -7.3638601  | 4.28850882 | 3.8539121  |
| C | -0.47192187 | -8.57336328 | 4.10762927 | 4.13590503 |
| C | 1.70675858  | -7.39439071 | 4.26466362 | 3.98172682 |
| C | 3.8270562   | -6.2050109  | 4.53306472 | 4.14029407 |
| C | -1.88616365 | -8.59998578 | 4.15285002 | 3.85294694 |
| C | 2.39682035  | -8.60975378 | 4.26852362 | 4.1367185  |
| C | 4.53388934  | -7.43688801 | 4.52760804 | 3.85541606 |

|   |            |             |            |            |
|---|------------|-------------|------------|------------|
| C | 3.80767496 | -8.66577258 | 4.38251713 | 3.85311858 |
|---|------------|-------------|------------|------------|

|   |             |             |            |            |
|---|-------------|-------------|------------|------------|
| C | 0.37436298  | 9.64314145  | 4.4030986  | 3.98257651 |
| C | -0.3702091  | 10.90797979 | 4.4952174  | 3.98325433 |
| C | -1.76826631 | 10.92092149 | 4.42843095 | 4.13394961 |
| C | 0.34584843  | 12.15179096 | 4.66149733 | 3.98363425 |
| C | 2.54750889  | 10.92538974 | 4.47738022 | 3.97843181 |
| C | -2.51334431 | 12.1244114  | 4.52655047 | 3.84932298 |
| C | -0.38545246 | 13.33641554 | 4.79704234 | 4.14028062 |
| C | 1.81956902  | 12.16390565 | 4.63395536 | 3.9803185  |
| C | 3.94300183  | 10.96160573 | 4.38703577 | 4.13348474 |
| C | -1.80364142 | 13.35539033 | 4.72307896 | 3.85438982 |
| C | 2.53199579  | 13.36714193 | 4.70356863 | 4.13878668 |
| C | 4.6678933   | 12.18117518 | 4.43986972 | 3.85121438 |
| C | 3.9478069   | 13.41108945 | 4.59927412 | 3.85194331 |
| C | 6.65753093  | 13.34681561 | 4.3661181  | 3.85319502 |
| C | -4.58512842 | -8.5314128  | 4.33371146 | 3.85730823 |
| C | 6.50323911  | -8.62595534 | 4.58665301 | 3.85993738 |
| C | -4.51905045 | 13.26453602 | 4.51125861 | 3.85310913 |
| C | 5.93095677  | 14.59076691 | 4.50541808 | 3.8534672  |
| C | -3.79926753 | 14.50731108 | 4.69010467 | 3.85892511 |
| C | -3.86264877 | -9.77429553 | 4.19740994 | 3.8542244  |
| C | 5.77234009  | -9.86539139 | 4.45241904 | 3.85208495 |
| C | 8.11628455  | 13.36565136 | 4.24460289 | 4.01196943 |
| C | 8.80178476  | 14.60931893 | 4.27838851 | 4.00734344 |
| C | 8.84180286  | 12.1675988  | 4.09216701 | 4.09399996 |
| C | 10.2163706  | 14.6119841  | 4.14926971 | 4.00790739 |
| C | 10.24282189 | 12.16050548 | 3.96908811 | 3.98297739 |
| C | 10.90900358 | 13.40018561 | 3.99531887 | 4.08817929 |
| C | -6.04375731 | -8.55409603 | 4.41518858 | 4.00985644 |
| C | -6.76185519 | -7.34786865 | 4.45547061 | 4.09410608 |
| C | -6.73170422 | -9.79836495 | 4.41911954 | 4.00356037 |
| C | -8.16835514 | -7.32296769 | 4.47424194 | 3.99580652 |
| C | -8.14836426 | -9.79046525 | 4.50489095 | 4.01210738 |

|   |           |             |            |            |
|---|-----------|-------------|------------|------------|
| C | -8.835937 | -8.55897162 | 4.50745312 | 4.09484293 |
|---|-----------|-------------|------------|------------|

|   |              |             |            |            |
|---|--------------|-------------|------------|------------|
| C | -5.98161746  | 13.28070178 | 4.4086605  | 4.00782581 |
| C | -6.70314725  | 12.08970786 | 4.2003953  | 4.09409507 |
| C | -6.67736598  | 14.51681562 | 4.50891324 | 4.00939167 |
| C | -8.10779236  | 12.07811083 | 4.09628421 | 3.9832134  |
| C | -8.0949674   | 14.52043312 | 4.39185283 | 4.00823537 |
| C | -8.78293429  | 13.30936898 | 4.19132353 | 4.09431821 |
| C | 7.96076068   | -8.64907661 | 4.64636341 | 4.01131257 |
| C | 8.68141463   | -7.4389249  | 4.63063741 | 4.09689523 |
| C | 8.64455237   | -9.89388111 | 4.6615822  | 4.00503409 |
| C | 10.08610921  | -7.41429977 | 4.64018374 | 3.99385741 |
| C | 10.06472457  | -9.8200255  | 4.71750481 | 4.00720987 |
| C | 10.75732635  | -8.65155162 | 4.70115587 | 4.09329836 |
| C | 6.20771926   | 2.38809509  | 4.0913485  | 3.89288989 |
| C | 6.81750278   | 0.97148136  | 4.04393482 | 4.22016257 |
| C | 6.66716782   | 3.15289959  | 2.82747223 | 4.21595776 |
| C | 6.7383917    | 3.1082589   | 5.35390384 | 4.21651849 |
| C | -4.04741197  | 2.50294058  | 4.17219063 | 3.89227527 |
| C | -4.69616229  | 1.1051815   | 4.17829775 | 4.22068804 |
| C | -4.4961816   | 3.25956896  | 5.44515147 | 4.21788814 |
| C | -4.52837123  | 3.25598707  | 2.90940595 | 4.21687648 |
| C | -8.86342513  | 10.79847046 | 3.67734696 | 3.89204135 |
| C | -8.88752429  | 10.83400302 | 2.15380922 | 4.2185204  |
| C | -8.1386752   | 9.50329605  | 4.09140463 | 4.22942076 |
| C | -10.33123961 | 10.76226869 | 4.14840857 | 4.22913534 |
| C | 11.06973241  | 10.86514776 | 3.81283547 | 3.89119075 |
| C | 10.19201837  | 9.60216501  | 3.91728894 | 4.22168939 |
| C | 11.75399843  | 10.86775625 | 2.42862847 | 4.21910842 |
| C | 12.1489068   | 10.82290872 | 4.92046954 | 4.22681034 |
| C | 10.88781265  | -6.09837725 | 4.54381038 | 3.89260407 |
| C | 11.72017506  | -6.1227948  | 3.24013309 | 4.21610616 |
| C | 9.97058807   | -4.85795969 | 4.50657742 | 4.21909748 |
| C | 11.81974135  | -5.97584192 | 5.77038265 | 4.2158231  |



|   |             |             |            |            |
|---|-------------|-------------|------------|------------|
| C | -8.90216705 | -5.96225807 | 4.42494853 | 3.89189914 |
|---|-------------|-------------|------------|------------|

|   |              |             |             |            |
|---|--------------|-------------|-------------|------------|
| C | -8.49614311  | -5.12212438 | 5.65839749  | 4.21594678 |
| C | -8.48921754  | -5.23024506 | 3.12537757  | 4.21628489 |
| C | -10.43810855 | -6.10493032 | 4.42086365  | 4.22050643 |
| C | 3.25611228   | -1.09688308 | -0.15668262 | 3.98427029 |
| C | 2.54369338   | 0.11458662  | -0.16096681 | 4.09127544 |
| C | 1.13522435   | 0.1457036   | -0.16007167 | 4.01090698 |
| C | 0.39630434   | -1.06624985 | -0.15683665 | 4.00758746 |
| C | 1.10944889   | -2.29338581 | -0.15043697 | 4.00831876 |
| C | 2.51391959   | -2.29230992 | -0.15017986 | 4.08880451 |
| C | 0.41888254   | 1.420055    | -0.16764943 | 3.85634887 |
| C | -1.05221418  | -1.05579125 | -0.15799012 | 4.00318737 |
| C | -1.76673925  | 0.17160463  | -0.14860227 | 4.00719141 |
| C | -3.1750243   | 0.16477082  | -0.1260877  | 4.09661137 |
| C | -3.91194949  | -1.03244655 | -0.12817067 | 3.99370591 |
| C | -3.19208797  | -2.24301443 | -0.15642332 | 4.09361949 |
| C | -1.78629767  | -2.27393065 | -0.16455296 | 4.00754026 |
| C | 0.37580106   | -3.55606557 | -0.15485979 | 3.85491911 |
| C | -1.06951431  | -3.55048175 | -0.17127839 | 3.8565434  |
| C | -1.06634202  | -5.85440591 | -0.1966065  | 3.85274658 |
| C | 0.36764919   | -5.8555442  | -0.1764962  | 3.85273002 |
| C | -1.7503029   | -7.09673573 | -0.23961095 | 4.13434767 |
| C | 1.05956051   | -7.09167977 | -0.21229294 | 4.13505178 |
| C | 0.38072134   | -8.31145067 | -0.2699182  | 3.98246093 |
| C | -1.02802479  | 1.43518857  | -0.16148499 | 3.85384765 |
| C | -0.9965426   | 3.7395056   | -0.20116515 | 3.85114792 |
| C | 0.43795127   | 3.72223148  | -0.19641741 | 3.85364085 |
| C | -1.66656568  | 4.99047092  | -0.23522045 | 4.13528449 |
| C | 1.1435049    | 4.95258628  | -0.20079078 | 4.13571578 |
| C | 0.47826681   | 6.18094472  | -0.23073375 | 3.97954384 |
| C | -1.06392095  | -8.31468516 | -0.27194697 | 3.98238621 |
| C | -1.79584703  | -9.5901154  | -0.32340875 | 3.97813411 |
| C | -3.19176912  | -9.61884382 | -0.22094793 | 4.13394792 |

|   |             |              |             |            |
|---|-------------|--------------|-------------|------------|
| C | -1.06779476 | -10.82844966 | -0.47995408 | 3.97987193 |
|---|-------------|--------------|-------------|------------|

|   |             |              |             |            |
|---|-------------|--------------|-------------|------------|
| C | 1.12529262  | -9.57593769  | -0.36516245 | 3.98315102 |
| C | -3.92562055 | -10.83270909 | -0.2795354  | 3.85112189 |
| C | -1.78685136 | -12.02678023 | -0.54600993 | 4.13791744 |
| C | 0.40687434  | -10.81952366 | -0.52333312 | 3.98348593 |
| C | 2.52458304  | -9.58652745  | -0.32432734 | 4.13413238 |
| C | -3.20364472 | -12.05978821 | -0.44792337 | 3.85231089 |
| C | 1.13860296  | -12.00223487 | -0.67712561 | 4.13982305 |
| C | 3.27123024  | -10.78689284 | -0.44825366 | 3.84945202 |
| C | 2.55948324  | -12.01813867 | -0.63755238 | 3.85423351 |
| C | -0.96624821 | 6.20088      | -0.26489218 | 3.9783959  |
| C | -1.68077157 | 7.48715666   | -0.3138249  | 3.98038524 |
| C | -3.06654214 | 7.54260586   | -0.4907317  | 4.14024542 |
| C | -0.9463683  | 8.72182803   | -0.17446481 | 3.98182271 |
| C | 1.23220365  | 7.44331525   | -0.19784107 | 3.98106218 |
| C | -3.76983218 | 8.77656303   | -0.48913389 | 3.85559567 |
| C | -1.63332974 | 9.93986785   | -0.18053915 | 4.13620925 |
| C | 0.51958132  | 8.69373124   | -0.08993044 | 3.98146213 |
| C | 2.63029549  | 7.4538307    | -0.25578344 | 4.13390603 |
| C | -3.04260043 | 10.00248895  | -0.32375026 | 3.85317892 |
| C | 1.24182009  | 9.88144002   | 0.03334529  | 4.1354504  |
| C | 3.3702191   | 8.66392987   | -0.18870337 | 3.85398267 |
| C | 2.65658045  | 9.89680596   | -0.02111881 | 3.85245434 |
| C | 5.36007134  | 9.82619593   | -0.23046721 | 3.85724093 |
| C | -5.92212083 | -11.99510299 | -0.22675052 | 3.85206074 |
| C | 5.28230693  | -11.91979771 | -0.49073085 | 3.8529725  |
| C | -5.73659548 | 9.96965906   | -0.58025395 | 3.85939882 |
| C | 4.63455336  | 11.06313944  | -0.07569655 | 3.85512721 |
| C | -5.00500812 | 11.20740603  | -0.43437875 | 3.8516836  |
| C | -5.18944724 | -13.23576752 | -0.37965542 | 3.85505501 |
| C | 4.5616537   | -13.16263602 | -0.66602183 | 3.85927477 |
| C | 6.81929373  | 9.86949      | -0.32626376 | 4.00875394 |
| C | 7.4938179   | 11.12344962  | -0.30810995 | 4.0037868  |

|   |            |            |             |            |
|---|------------|------------|-------------|------------|
| C | 7.55773881 | 8.67754903 | -0.41767952 | 4.09496801 |
|---|------------|------------|-------------|------------|

|   |              |              |             |            |
|---|--------------|--------------|-------------|------------|
| C | 8.9085164    | 11.1366542   | -0.4097404  | 4.01008996 |
| C | 8.96332637   | 8.67709134   | -0.49314691 | 3.993265   |
| C | 9.6162598    | 9.92137137   | -0.49408024 | 4.09906815 |
| C | -7.38561991  | -12.02837678 | -0.11861989 | 4.01182087 |
| C | -8.146786    | -10.84969282 | 0.02956005  | 4.09086519 |
| C | -8.04661302  | -13.28908198 | -0.15636315 | 4.00714115 |
| C | -9.55464172  | -10.87606066 | 0.13622201  | 3.98252978 |
| C | -9.45815396  | -13.31917679 | -0.03465339 | 4.00731368 |
| C | -10.18489703 | -12.12815484 | 0.108382    | 4.09254948 |
| C | -7.19442524  | 9.99472486   | -0.65192606 | 4.01139662 |
| C | -7.91801307  | 8.78869129   | -0.63784836 | 4.09458722 |
| C | -7.87977536  | 11.24032204  | -0.66311802 | 4.00512997 |
| C | -9.32604344  | 8.76425244   | -0.63889476 | 3.9938017  |
| C | -9.29958558  | 11.22662682  | -0.71443044 | 4.00739158 |
| C | -9.99632508  | 9.99810972   | -0.69714876 | 4.09491504 |
| C | 6.7470197    | -11.9349794  | -0.4077598  | 4.00786747 |
| C | 7.47058182   | -10.74402875 | -0.20503676 | 4.09404424 |
| C | 7.44337835   | -13.17136502 | -0.50871158 | 4.00924494 |
| C | 8.87561263   | -10.73324619 | -0.10338156 | 3.98332846 |
| C | 8.86152721   | -13.1770824  | -0.38818593 | 4.0083879  |
| C | 9.54976763   | -11.96562931 | -0.19193511 | 4.09425806 |
| C | 4.79843471   | -1.16814914  | -0.16640108 | 3.89227061 |
| C | 5.27751816   | -1.91720323  | 1.09950293  | 4.21695639 |
| C | 5.25087448   | -1.92761942  | -1.4362646  | 4.21775163 |
| C | 5.44532389   | 0.23039073   | -0.17407812 | 4.22070734 |
| C | -5.45830588  | -1.06115536  | -0.08863052 | 3.89288058 |
| C | -5.99127252  | -1.78243684  | -1.34950432 | 4.21641579 |
| C | -5.91492451  | -1.82477692  | 1.17710134  | 4.21596756 |
| C | -6.06816449  | 0.3554524    | -0.04099483 | 4.22014614 |
| C | -10.05751522 | 7.41033438   | -0.51806223 | 3.89256435 |
| C | -9.67067233  | 6.51048326   | -1.71391253 | 4.21602098 |
| C | -9.62460383  | 6.74286081   | 0.80949466  | 4.21635735 |

|   |              |            |             |            |
|---|--------------|------------|-------------|------------|
| C | -11.59093649 | 7.56874937 | -0.50402058 | 4.21889087 |
|---|--------------|------------|-------------|------------|

|   |              |             |             |            |
|---|--------------|-------------|-------------|------------|
| C | 9.72704632   | 7.33455991  | -0.54483891 | 3.89267422 |
| C | 9.48092203   | 6.58101276  | 0.78370098  | 4.21546778 |
| C | 9.20883767   | 6.48954468  | -1.73240109 | 4.2168885  |
| C | 11.24721639  | 7.53195354  | -0.71727874 | 4.21966876 |
| C | 9.62989549   | -9.45438752 | 0.32138957  | 3.89191564 |
| C | 8.90903102   | -8.15777668 | -0.09599586 | 4.22939688 |
| C | 9.64064768   | -9.49776731 | 1.84508318  | 4.21873893 |
| C | 11.10121766  | -9.41262752 | -0.13745308 | 4.22904624 |
| C | -10.38972132 | -9.59653081 | 0.37005958  | 3.8915819  |
| C | -10.10379462 | -9.10492421 | 1.79455074  | 4.22101965 |
| C | -10.01304305 | -8.48986864 | -0.62359003 | 4.2217117  |
| C | -11.90711099 | -9.85304004 | 0.23413537  | 4.21962389 |
| N | -0.37841887  | -1.22307142 | 4.1793971   | 5.27540086 |
| N | -0.31652288  | 6.02535763  | 4.22389066  | 5.27481324 |
| N | 2.45769799   | -1.25241218 | 4.18476904  | 5.2783554  |
| N | 2.52056639   | 6.01863578  | 4.24763988  | 5.2778633  |
| N | 6.02478307   | 12.17305696 | 4.3326886   | 5.27565608 |
| N | 4.60107709   | 14.60669625 | 4.62273696  | 5.28174082 |
| N | -3.87213113  | 12.10123611 | 4.42969006  | 5.27081029 |
| N | -2.47059068  | 14.53877068 | 4.79956413  | 5.28217582 |
| N | -3.95836085  | -7.35437864 | 4.37346573  | 5.27995564 |
| N | -2.53419213  | -9.79455441 | 4.10317811  | 5.27426195 |
| N | 4.44291586   | -9.8693672  | 4.35375423  | 5.26961087 |
| N | 5.88935517   | -7.44299534 | 4.63151833  | 5.28018515 |
| N | -1.76720546  | -4.68711311 | -0.19007709 | 5.27776131 |
| N | -1.71069414  | 2.58093521  | -0.17649147 | 5.27843352 |
| N | 1.07073617   | -4.69247259 | -0.15251242 | 5.27472929 |
| N | 1.12635478   | 2.54968152  | -0.1200587  | 5.27531341 |
| N | 4.72929516   | 8.65077373  | -0.28258237 | 5.27959379 |
| N | 3.30798884   | 11.08659195 | 0.03841658  | 5.27428172 |
| N | -5.12361703  | 8.78610625  | -0.61680388 | 5.28029981 |
| N | -3.67731869  | 11.20744401 | -0.30768465 | 5.26990515 |



|   |             |              |             |            |
|---|-------------|--------------|-------------|------------|
| N | -5.28509966 | -10.82353641 | -0.17787169 | 5.27553938 |
|---|-------------|--------------|-------------|------------|

|   |             |              |             |            |
|---|-------------|--------------|-------------|------------|
| N | -3.86020778 | -13.25121939 | -0.49392009 | 5.27881112 |
| N | 3.23007462  | -13.19742709 | -0.74264384 | 5.28211881 |
| N | 4.63226553  | -10.7599792  | -0.38347221 | 5.27058974 |

## Section 11. References

- [1] C. Li, X. Zhang, Z. Lv, K. Wang, X. Sun, X. Chen, Y. Ma, Scalable combustion synthesis of graphene-welded activated carbon for high-performance supercapacitors, *Chemical Engineering Journal*, 414 (2021) 128781.
- [2] K. Kang, Z. Wu, M. Zhao, Z. Li, Y. Ma, J. Zhang, Y. Wang, M. Sajjad, R. Tao, L. Qiu, A nanostructured covalent organic framework with readily accessible triphenylstibine moieties for high-performance supercapacitors, *Chemical Communications*, 58 (2022) 3649-3652.
- [3] Y. Zhu, S. Murali, M.D. Stoller, K.J. Ganesh, W. Cai, P.J. Ferreira, A. Pirkle, R.M. Wallace, K.A. Cychosz, M. Thommes, D. Su, E.A. Stach, R.S. Ruoff, Carbon-Based Supercapacitors Produced by Activation of Graphene, *Science*, 332 (2011) 1537-1541.
- [4] Y. Xu, C.Y. Chen, Z. Zhao, Z. Lin, C. Lee, X. Xu, C. Wang, Y. Huang, M.I. Shakir, X. Duan, Solution Processable Holey Graphene Oxide and Its Derived Macrostructures for High-Performance Supercapacitors, *Nano Lett*, 15 (2015) 4605-4610.
- [5] L.-F. Chen, X.-D. Zhang, H.-W. Liang, M. Kong, Q.-F. Guan, P. Chen, Z.-Y. Wu, S.-H. Yu, Synthesis of Nitrogen-Doped Porous Carbon Nanofibers as an Efficient Electrode Material for Supercapacitors, *ACS Nano*, 6 (2012) 7092-7102.
- [6] L. Zhang, F. Zhang, X. Yang, G. Long, Y. Wu, T. Zhang, K. Leng, Y. Huang, Y. Ma, A. Yu, Y. Chen, Porous 3D graphene-based bulk materials with exceptional high surface area and excellent conductivity for supercapacitors, *Sci Rep*, 3 (2013) 1408.
- [7] L.L. Zhang, X. Zhao, M.D. Stoller, Y. Zhu, H. Ji, S. Murali, Y. Wu, S. Perales, B. Clevenger, R.S. Ruoff, Highly conductive and porous activated reduced graphene oxide films for high-power supercapacitors, *Nano Lett*, 12 (2012) 1806-1812.
- [8] J. Zhao, Y. Jiang, H. Fan, M. Liu, O. Zhuo, X. Wang, Q. Wu, L. Yang, Y. Ma, Z. Hu, Porous 3D Few-Layer Graphene-like Carbon for Ultrahigh-Power Supercapacitors with Well-Defined Structure-Performance Relationship, *Adv Mater*, 29 (2017).
- [9] Y. Xu, Z. Lin, X. Zhong, X. Huang, N.O. Weiss, Y. Huang, X. Duan, Holey graphene frameworks for highly efficient capacitive energy storage, *Nat Commun*, 5 (2014) 4554.

- [10] L. Hao, J. Ning, B. Luo, B. Wang, Y. Zhang, Z. Tang, J. Yang, A. Thomas, L. Zhi, Structural evolution of 2D microporous covalent triazine-based framework toward the study of high-performance supercapacitors, *J Am Chem Soc*, 137 (2015) 219-225.
- [11] S.I. Wong, H. Lin, J. Sunarso, B.T. Wong, B. Jia, Optimization of ionic-liquid based electrolyte concentration for high-energy density graphene supercapacitors, *Applied Materials Today*, 18 (2020) 100522.
- [12] N. Guo, M. Li, X. Sun, F. Wang, R. Yang, Enzymatic hydrolysis lignin derived hierarchical porous carbon for supercapacitors in ionic liquids with high power and energy densities, *Green Chemistry*, 19 (2017) 2595-2602.
- [13] J. Liang, Z. Xiao, Y. Gao, X. Xu, D. Kong, M. Wagner, L. Zhi, Ionothermal strategy towards template-free hierarchical porous carbons for supercapacitive energy storage, *Carbon*, 143 (2019) 487-493.
- [14] Y. Chang, L. Zhou, Z. Xiao, J. Liang, D. Kong, Z. Li, X. Zhang, X. Li, L. Zhi, Embedding Reduced Graphene Oxide in Bacterial Cellulose-Derived Carbon Nanofibril Networks for Supercapacitors, *ChemElectroChem*, 4 (2017) 2448-2452.
- [15] S. Maiti, A. Pramanik, S. Mahanty, Influence of imidazolium-based ionic liquid electrolytes on the performance of nano-structured MnO<sub>2</sub> hollow spheres as electrochemical supercapacitor, *Rsc Advances*, 5 (2015) 41617-41626.
- [16] J.P. Perdew, A. Ruzsinszky, G.I. Csonka, O.A. Vydrov, G.E. Scuseria, L.A. Constantin, X. Zhou, K. Burke, Restoring the Density-Gradient Expansion for Exchange in Solids and Surfaces, *Physical Review Letters*, 100 (2008) 136406.
- [17] G. Kresse, J. Furthmüller, Efficiency of ab-initio total energy calculations for metals and semiconductors using a plane-wave basis set, *Computational Materials Science*, 6 (1996) 15-50.
- [18] G. Kresse, J. Furthmüller, Efficient iterative schemes for total-energy calculations using a plane-wave basis set, *Physical Review B*, 54 (1996) 11169-11186.
- [19] G. Kresse, J. Hafner, Ab initio molecular dynamics for liquid metals, *Physical Review B*, 47 (1993) 558-561.
